# Supplementary material for: Wnt/beta-catenin signalling is dispensable for adult neural stem cell homeostasis and activation
Source: Oxford University Press journal article supplement (doi:10.1242/dev.199629), 2021-09-24
Supplement: dev199629supp.pdf [file dev199629supp.pdf]

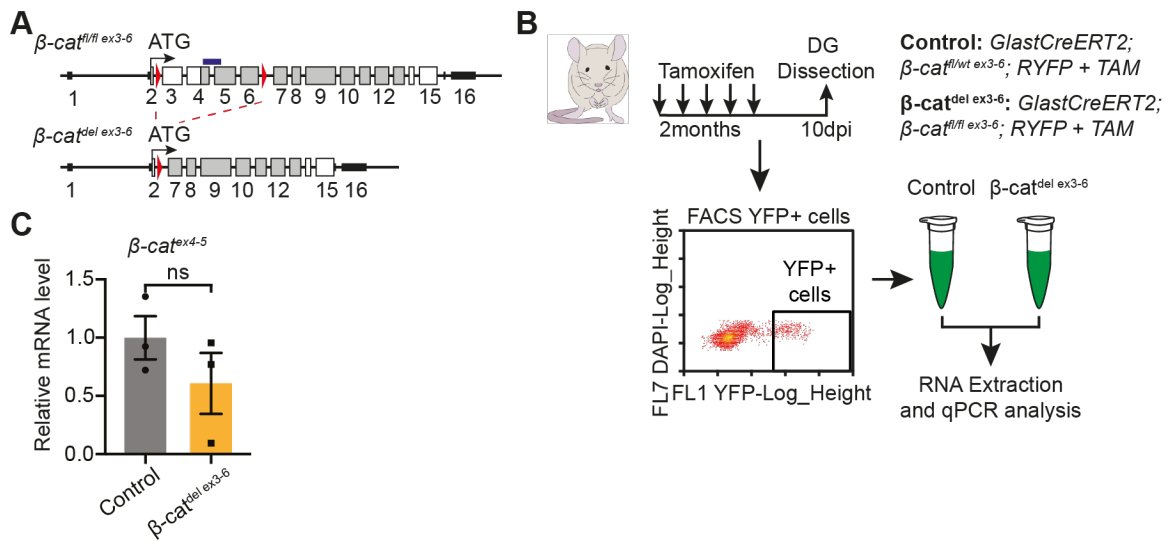

**Fig. S1. Analysis of failed  $\beta$ -catenin recombination in  $\beta$ -cat<sup>del ex3-6</sup> mice.**

(A)  $\beta$ -cat<sup>fl/fl</sup> ex3-6 allele before and after recombination. LoxP sites (red arrows) flank exons 3-6, which encode the N-terminal domain and armadillo repeats 1-4. Grey boxes indicate armadillo repeats. Blue box indicates the sequence recognised by the TaqMan probe used for qPCR analysis in (C).

(B) Two-month-old Control and  $\beta$ -cat<sup>del ex3-6</sup> mice were injected with tamoxifen once daily for 5 consecutive days to induce recombination of the  $\beta$ -cat<sup>fl/fl</sup> ex3-6 allele. Ten days after the first tamoxifen injection, the DG of individual mice were dissected and YFP+ cells were collected by flow cytometry for RNA extraction and qPCR analysis.

(C)  $\beta$ -cat<sup>ex4-5</sup> (blue box, A) expression is not significantly different between YFP+ cells collected by flow cytometry from the DG of Control and  $\beta$ -cat<sup>del ex3-6</sup> mice indicating failed recombination. n=3. Statistics: unpaired two-tailed Student's t-test. (ns, p>0.05). Error bars represent mean with SEM.

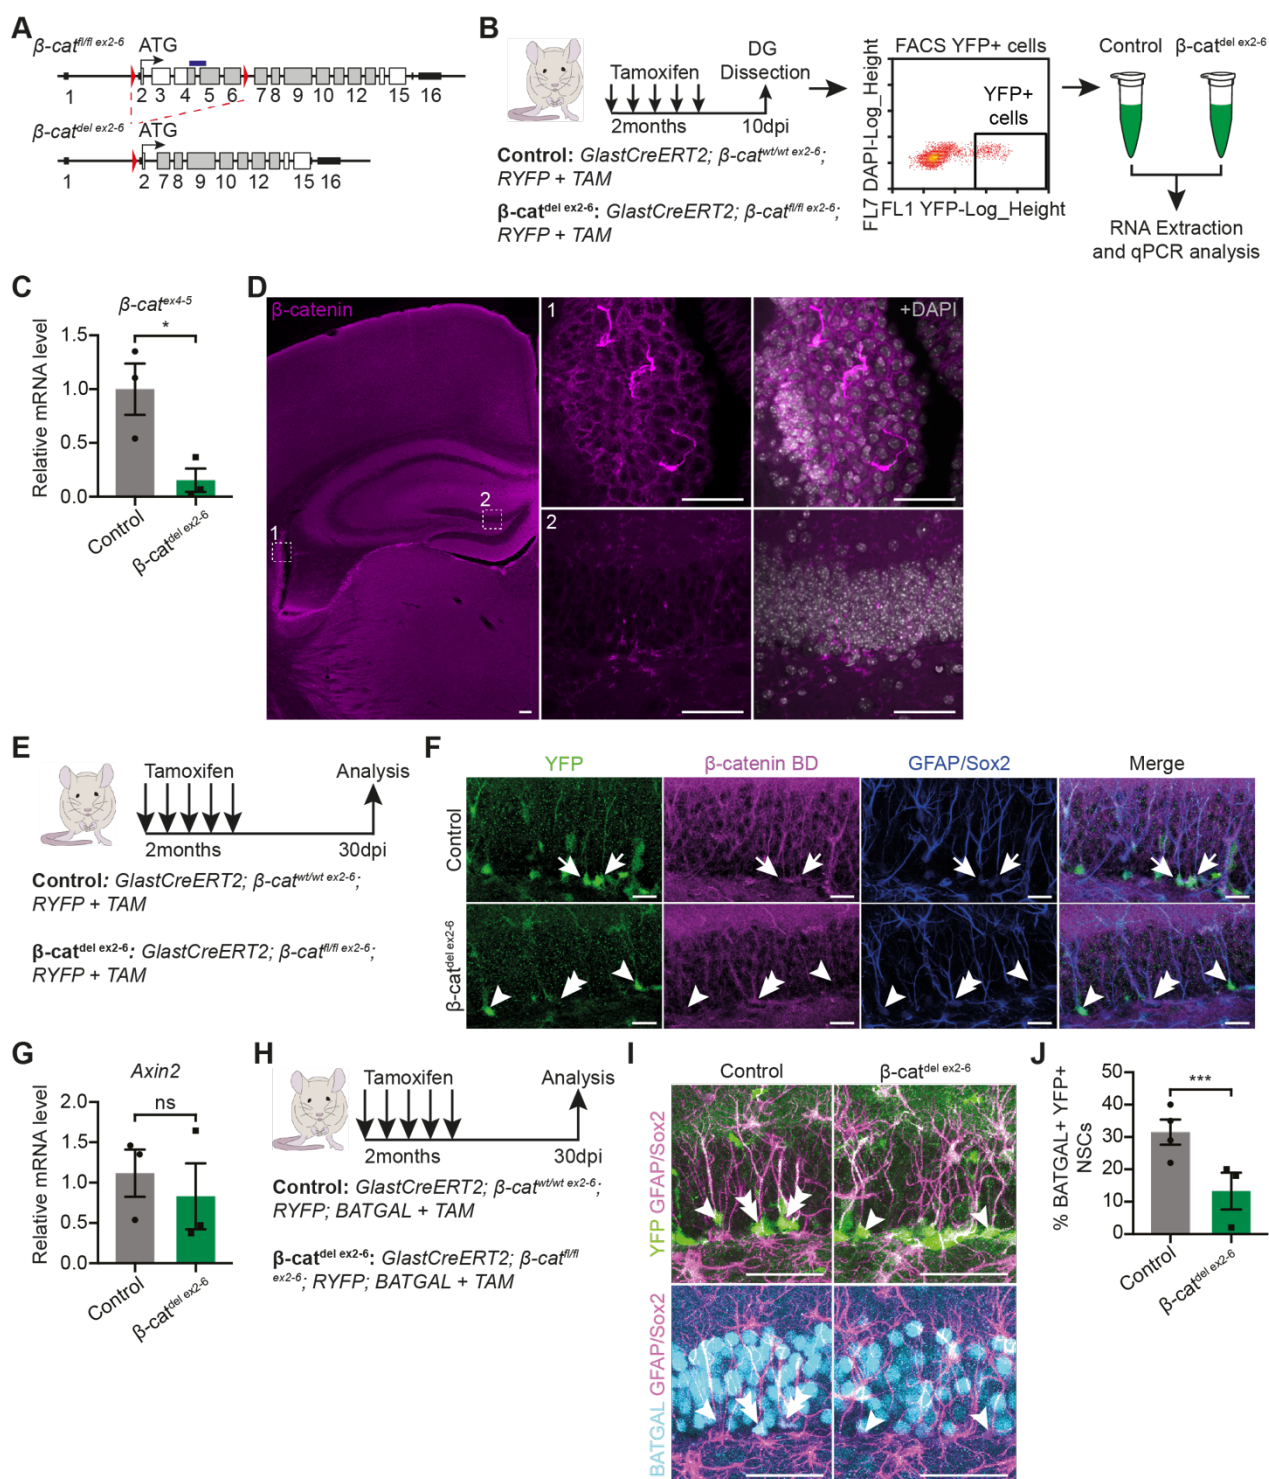

**Fig. S2. Analysis of successful  $\beta$ -catenin recombination in  $\beta$ -cat<sup>del ex2-6</sup> mice and resulting inhibition of Wnt/ $\beta$ -catenin signalling in  $\beta$ -cat<sup>del ex2-6</sup> mice.**

(A)  $\beta$ -cat<sup>fl/fl ex2-6</sup> allele before and after recombination.

(B) Two-month-old Control and  $\beta$ -cat<sup>del ex3-6</sup> mice were injected with tamoxifen once daily for 5 consecutive days. Ten days after the first tamoxifen injection, the DG of individual mice were dissected and YFP+ cells were collected by flow cytometry for RNA extraction and qPCR analysis.

(C)  $\beta$ -cat<sup>ex4-5</sup> (blue box, D) expression is significantly decreased in  $\beta$ -cat<sup>del ex2-6</sup> YFP+ cells compared with Control YFP+ cells indicating successful  $\beta$ -cat<sup>fl/fl ex2-6</sup> recombination. n=3.

(D) Comparison of  $\beta$ -catenin immunolabelling in the DG and SVZ of a wild type two-month-old mouse.  $\beta$ -catenin immunolabelling marks the cellular membrane and is stronger in the SVZ compared with the DG. Scale bar, 50 $\mu$ m.

(E) Two-month-old Control and  $\beta$ -cat<sup>del ex2-6</sup> mice were administered tamoxifen for 5 consecutive days and sacrificed 30 days after the first tamoxifen injection.

(F)  $\beta$ -catenin, YFP, GFAP and Sox2 immunolabelling in the DG of Control and  $\beta$ -cat<sup>del ex2-6</sup> mice. Arrows in control indicate YFP-positive,  $\beta$ -catenin-positive NSCs. Arrowheads in  $\beta$ -cat<sup>del ex2-6</sup> mice indicate recombined YFP-positive,  $\beta$ -catenin-negative NSCs whereas the double arrowhead indicates an un-recombined YFP-negative,  $\beta$ -catenin-positive NSC. Scale bar, 50 $\mu$ m.

(G) *Axin2* expression is unchanged in  $\beta$ -cat<sup>del ex2-6</sup> YFP+ cells compared with Control YFP+ cells following FAC Sorting of YFP-positive cells in control and  $\beta$ -cat<sup>del ex3-6</sup> mice as described in (B). n=3.

(H) Two-month-old Control and  $\beta$ -cat<sup>del ex2-6</sup> mice, crossed with BATGAL Wnt/ $\beta$ -catenin reporter mice, were administered tamoxifen for 5 consecutive days and sacrificed 30 days after the first tamoxifen injection.

(I) BATGAL ( $\beta$ -galactosidase), GFAP and Sox2 immunolabelling in the DG of Control and  $\beta$ -cat<sup>del ex2-6</sup> mice crossed with *BATGAL* mice. Arrowheads indicate BATGAL- NSCs and double arrowheads indicate BATGAL+ NSCs. Scale bar, 50 $\mu$ m.

(J) Quantification of the proportion of BATGAL+ NSCs in (H). The decreased proportion of BATGAL+ NSCs in  $\beta$ -cat<sup>del ex2-6</sup> mice ( $13.33 \pm 5.69\%$ , n=3) compared with Control ( $31.5 \pm 3.88\%$ , n=4) indicates successful inhibition of Wnt/ $\beta$ -catenin signalling following recombination of the  $\beta$ -cat<sup>fl/fl ex2-6</sup> allele.

Statistics: unpaired two-tailed Student's t-test (C, G and J). (ns, p>0.05. \*, p<0.05. \*\*\*, p<0.001). Error bars represent mean with SEM.



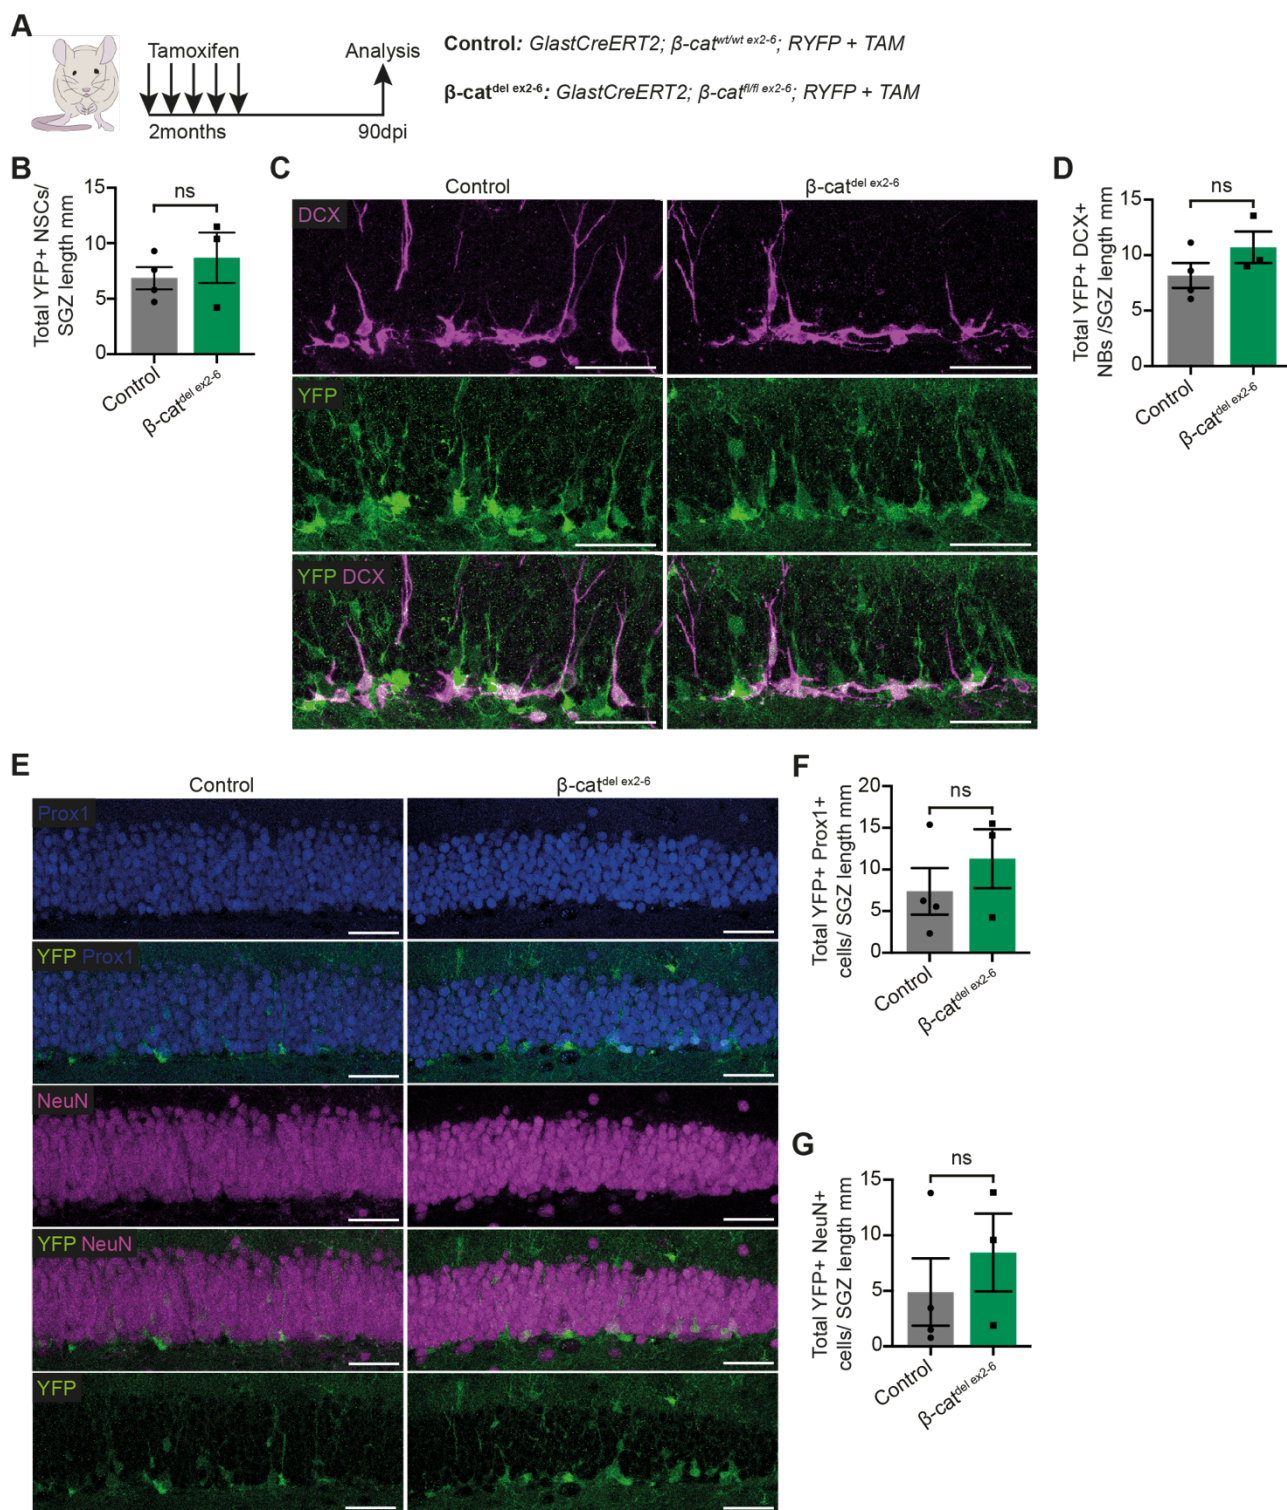



**Fig. S3. NSCs and adult hippocampal neurogenesis are unaffected by the long-term deletion of  $\beta$ -catenin and inhibition of Wnt/ $\beta$ -catenin signalling in NSCs.**

(A) Two-month-old Control and  $\beta$ -cat<sup>del ex2-6</sup> mice were administered tamoxifen for 5 consecutive days and sacrificed 90 days after the first tamoxifen injection.

(B) Quantifications of the total number of NSCs (YFP+ GFAP+ Sox2+ radial cells in the SGZ) normalised to the length of the SGZ (mm) in Control ( $6.85 \pm 1.00$ ) and  $\beta$ -cat<sup>del ex2-6</sup> ( $8.69 \pm 2.27$ ) mice 90 days after tamoxifen administration. n=3

(C) YFP and DCX immunolabelling in the DG of Control and  $\beta$ -cat<sup>del ex2-6</sup> mice 90 days after tamoxifen administration. Scale bars, 50 $\mu$ m.

(D) Quantifications of the data shown in (C). The total number of neuroblasts (NBs, DCX+ YFP+ cells) normalised to the SGZ length (mm) are unchanged between Control ( $8.17 \pm 1.12$ ) and  $\beta$ -cat<sup>del ex2-6</sup> mice ( $10.72 \pm 1.43$ ), indicating that NBs are unaffected by long-term  $\beta$ -catenin deletion. n=3.

(E) YFP, Prox1 and NeuN immunolabelling in the DG of Control and  $\beta$ -cat<sup>del ex2-6</sup> mice 90 days after tamoxifen administration. Scale bars, 50 $\mu$ m.

(F, G) Quantifications of the data shown in (C). The total number of YFP+ Prox1+ cells normalised to the SGZ length (mm) (Control vs  $\beta$ -cat<sup>del ex2-6</sup>:  $7.38 \pm 2.8$  vs  $11.3 \pm 3.54$ , F) and the total number of YFP+ NeuN+ cells normalised to the SGZ length (mm) (Control vs  $\beta$ -cat<sup>del ex2-6</sup>:  $4.89 \pm 3.02$  vs  $8.45 \pm 3.5$ , G) are unchanged between Control and  $\beta$ -cat<sup>del ex2-6</sup> mice indicating that neurogenesis is unaffected by long-term  $\beta$ -catenin deletion. n=3.

Statistics: unpaired two-tailed Student's t-test (B, D, F, G). (ns,  $p > 0.05$ ). Error bars represent mean with SEM.

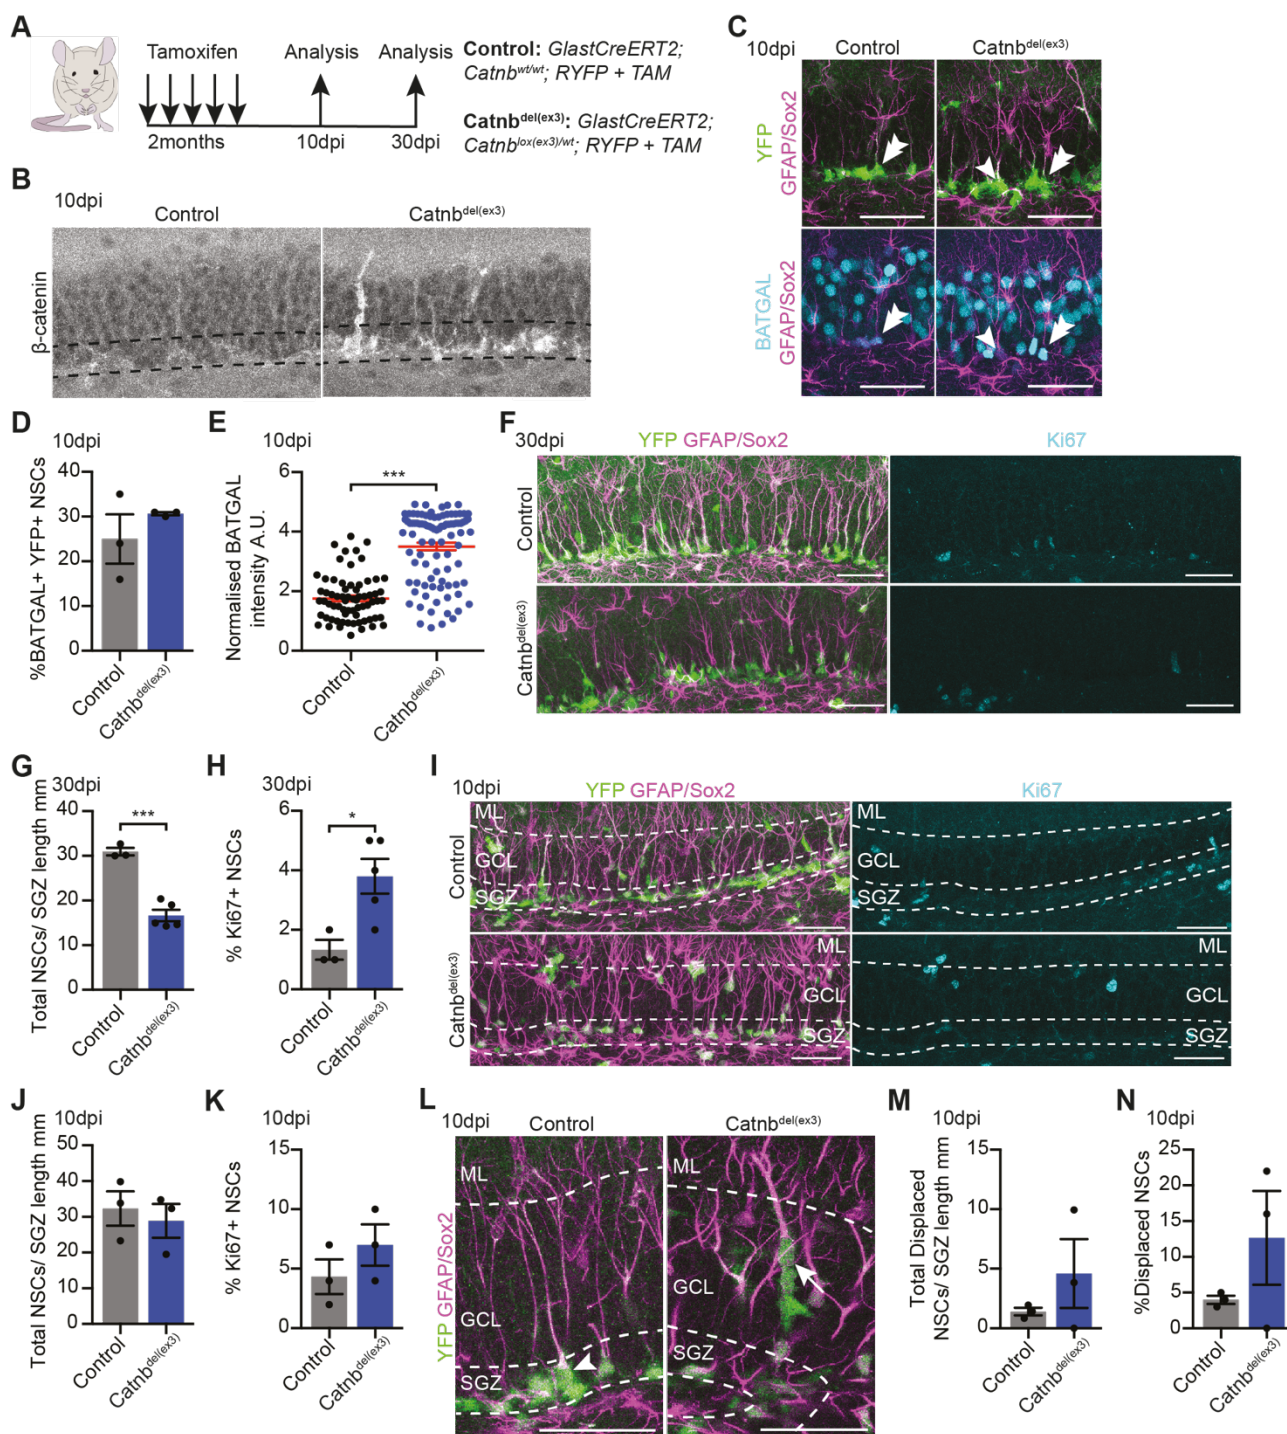

**Fig. S4. Stabilising  $\beta$ -catenin in NSCs *in vivo* displaces them from their correct niche location.**

(A) Two-month-old Control and *Catnb*<sup>del(ex3)</sup> mice were administered tamoxifen for 5 consecutive days and sacrificed 10 and 30 days after the first tamoxifen injection.

(B)  $\beta$ -catenin immunolabelling in the DG of Control and *Catnb*<sup>del(ex3)</sup> mice 10 days after tamoxifen. Increased  $\beta$ -catenin staining in *Catnb*<sup>del(ex3)</sup> mice indicates successful recombination. Dashed lines mark the SGZ. Scale bars, 50 $\mu$ m.

(C) BATGAL ( $\beta$ -galactosidase), GFAP and Sox2 immunolabelling in the DG of Control and *Catnb*<sup>del(ex3)</sup> mice crossed with BATGAL mice, 10 days after tamoxifen. Arrowheads indicate BATGAL<sup>-</sup> NSCs and double arrowheads indicate BATGAL<sup>+</sup> NSCs. Scale bar, 50 $\mu$ m.

(D) Quantification of the proportion of BATGAL<sup>+</sup> NSCs in (C). The proportion of BATGAL<sup>+</sup> NSCs is unchanged between Control ( $25 \pm 5.51\%$ ) and *Catnb*<sup>del(ex3)</sup> ( $30.67 \pm 0.33\%$ ) 10 days after tamoxifen, which corresponds to the proportion of NSCs expressing  $\beta$ -catenin by RNA sequencing (32% quiescent NSCs. n=3).

(E) Quantification of the data shown in (C) of the intensity of BATGAL staining in BATGAL<sup>+</sup> NSCs normalised to the BATGAL intensity in neighbouring DAPI<sup>+</sup> GCL cells. BATGAL reporter intensity is increased in BATGAL<sup>+</sup> NSCs in *Catnb*<sup>del(ex3)</sup> mice ( $p < 0.0001$ ). A.U.= Arbitrary Units. n=3

(F) YFP, GFAP, Sox2 and Ki67 immunolabelling in the DG of Control and *Catnb*<sup>del(ex3)</sup> mice 30 days after tamoxifen administration. Scale bars, 50 $\mu$ m.

(G, H) Quantifications of the data shown in (F) of the total number of NSCs normalised to SGZ length (mm) (Control vs *Catnb*<sup>del(ex3)</sup>:  $30.95 \pm 0.86$  vs  $16.65 \pm 1.26$ , G) and the proportion of Ki67<sup>+</sup> NSCs (Control vs *Catnb*<sup>del(ex3)</sup>:  $1.33 \pm 0.33\%$  vs  $3.8 \pm 0.58\%$ , H). NSCs are lost from the DG 30 after stabilising  $\beta$ -catenin and their proliferation is increased. n=3 for Control, n=5 for *Catnb*<sup>del(ex3)</sup>.

(I) YFP, GFAP, Sox2 and Ki67 immunolabelling in the DG of Control and *Catnb*<sup>del(ex3)</sup> mice 10 days after tamoxifen administration. Scale bars, 50 $\mu$ m.

(J, K) Quantifications of the data shown in (I) of the total number of NSCs normalised to the length of the SGZ (mm) (Control vs *Catnb*<sup>del(ex3)</sup>:  $32.38 \pm 4.83$  vs  $28.92 \pm 4.72$ , J) and the proportion of Ki67<sup>+</sup> NSCs (Control vs *Catnb*<sup>del(ex3)</sup>:  $4.33 \pm 1.45\%$  vs  $7 \pm 1.73\%$ , K). Neither the total number of NSCs nor their proliferation are affected 10 days after stabilising  $\beta$ -catenin. n=3.



**(L)** Representative images of SGZ located (arrowheads) and displaced (arrows) NSCs (YFP+ GFAP+ Sox2+ NSCs) in the DG of Control and Catnbdel(ex3) mice 10 days after tamoxifen administration. Dashed lines mark the SGZ. Scale bars, 50µm.

**(M, N)** Quantifications of the data shown in (L). SGZ located NSCs (arrowheads) retain their correct niche location with their cell body located in the SGZ and a radial process through the GCL. Displaced NSCs in Catnbdel(ex3) mice (arrows) were identified as YFP+ GFAP+ Sox2+ NSCs that are located more than 2 cell nuclei away from the SGZ. The total number of displaced NSCs normalised to the SGZ length (mm) (Control vs Catnbdel(ex3):  $1.42 \pm 0.32$  vs  $4.59 \pm 2.89$ , M) and the proportion of displaced NSCs (Control vs Catnbdel(ex3):  $4 \pm 0.58\%$  vs  $12.67 \pm 6.57\%$ , N).

Displacement of NSCs is increased in Catnbdel(ex3) mice compared with Control. n=3.

SGZ, subgranular zone. GCL, granule cell layer. ML, molecular layer.

Statistics: unpaired two-tailed Student's t-test (**D, E, G, H, J, K, M** and **N**). (ns,  $p > 0.05$ . \*,  $p < 0.05$ . \*\*\*,  $p < 0.001$ ). Error bars represent mean with SEM.

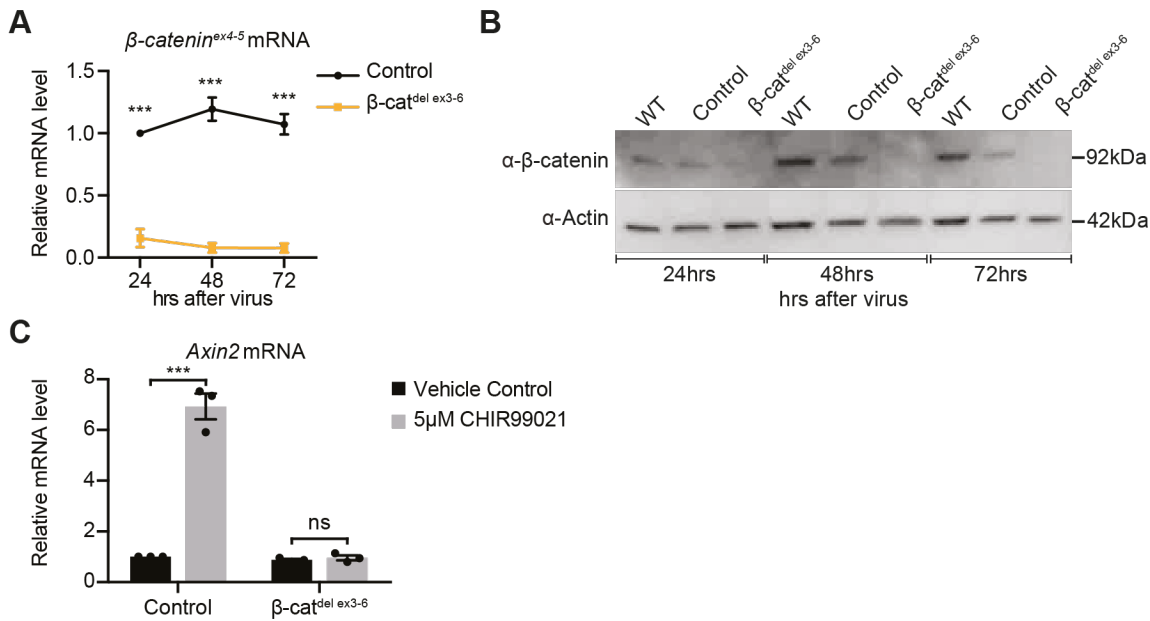

**Fig. S5. Validation of  $\beta$ -catenin recombination and deletion in  $\beta$ -catdel ex3-6 NSCs.**

(A) qPCR gene expression analysis of  $\beta$ -cat<sup>ex4-5</sup> (blue box, Figure S1A) 24hrs, 48hrs and 72hrs after control- and Cre-adenovirus transduction in Control and  $\beta$ -cat<sup>del ex3-6</sup> active NSCs.  $\beta$ -cat<sup>ex4-5</sup> lies within the floxed region of the  $\beta$ -cat<sup>fl/fl ex3-6</sup> allele and is downregulated in active  $\beta$ -cat<sup>del ex3-6</sup> NSCs vs Control ( $p < 0.0001$  for all time points).  $n = 3$ .

(B) Western blot of  $\beta$ -catenin protein levels in wild type (WT, no virus), Control (control-adenovirus) and  $\beta$ -cat<sup>del ex3-6</sup> (Cre-adenovirus) active NSCs 24hrs, 48hrs and 72hrs after adenovirus transduction.  $\beta$ -catenin protein levels are abolished 48hrs after adenovirus transduction.  $n = 3$ .

(C)  $\beta$ -cat<sup>del ex3-6</sup> active NSCs fail to upregulate *Axin2* in response to 5 $\mu$ M CHIR99021 treatment, indicating their inability to respond to a Wnt/ $\beta$ -catenin stimulus. CHIR99021 treatment began 48hrs after adenovirus transduction and maintained for 48hrs.  $n = 3$ .

Statistics: Two-way ANOVA with Sidak's multiple comparisons test (A, C). (ns,  $p > 0.05$ . \*\*\*,  $p < 0.001$ ). Error bars represent mean with SEM.

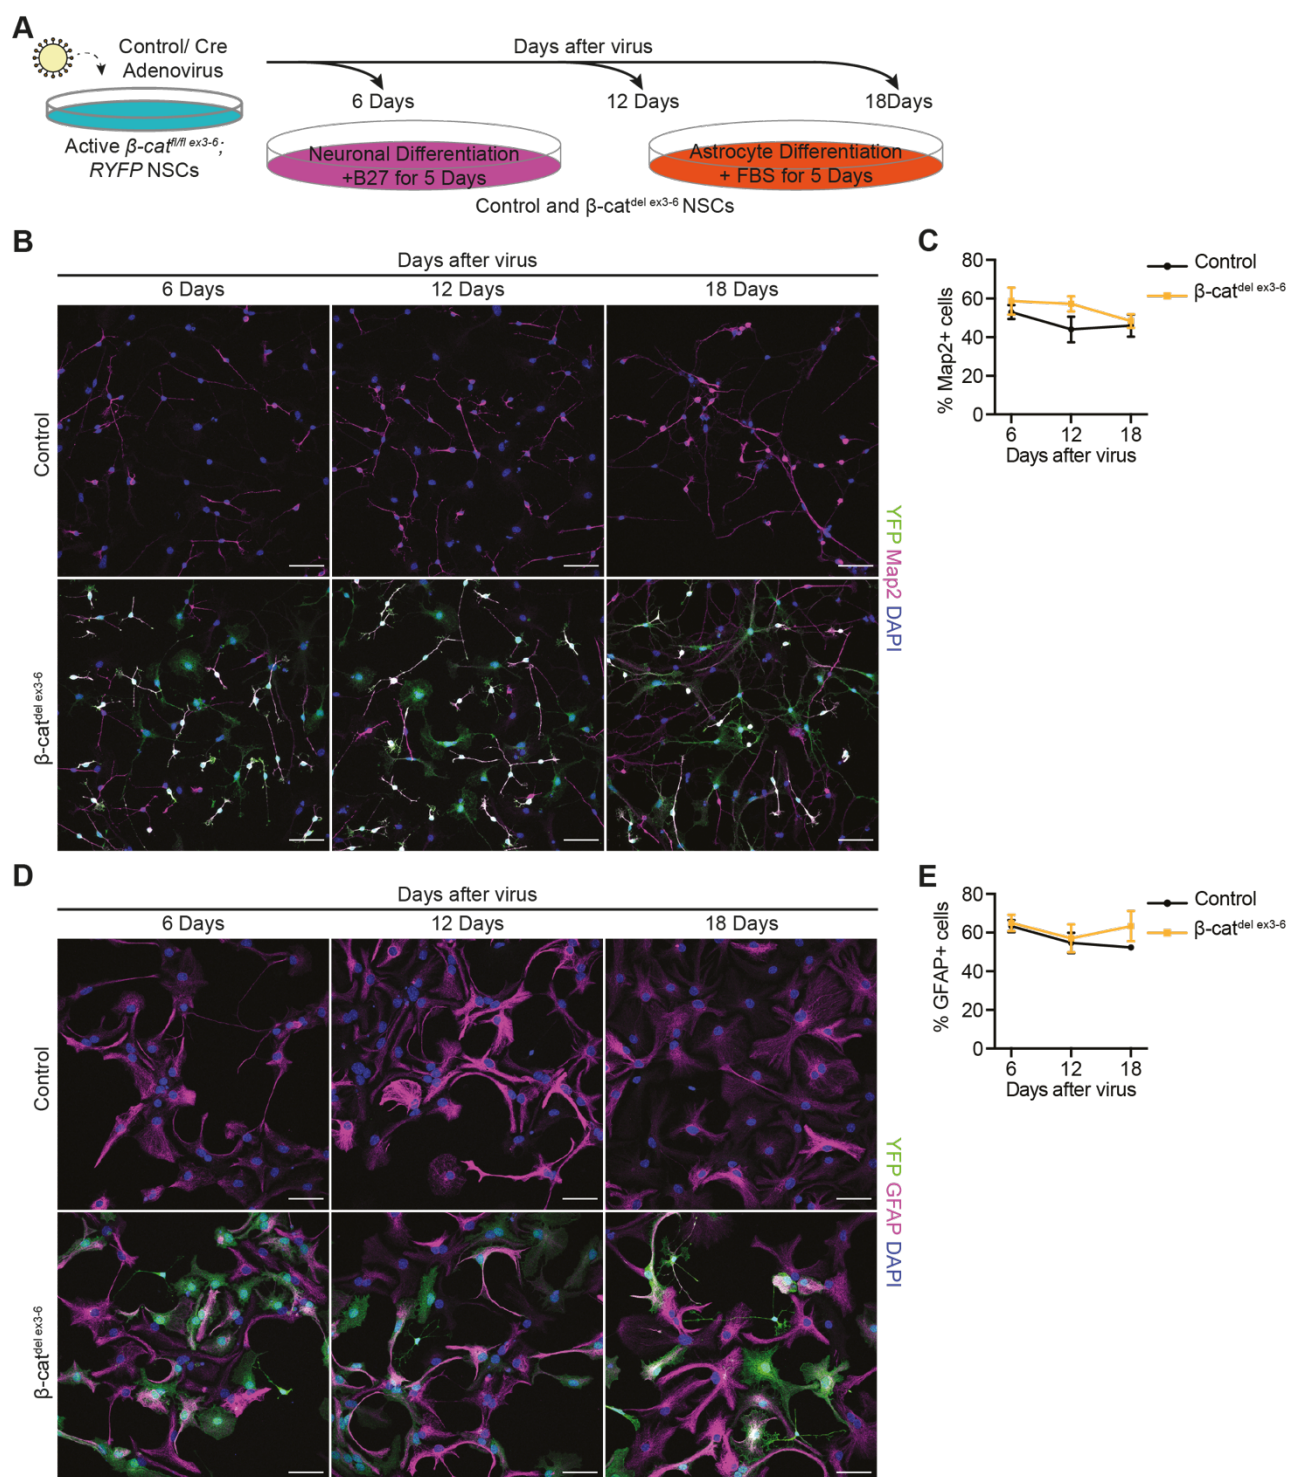



**Fig. S6. Chronic loss of Wnt/ $\beta$ -catenin signalling does not impair neuronal or astrocytic differentiation *in vitro*.**

(A) Six-, 12- and 18-days after virus transduction Control and  $\beta$ -cat<sup>fl/fl ex3-6</sup> NSCs were cultured for 5 days in conditions to promote neuronal (+B27) and astrocytic (+FBS) differentiation.

(B) YFP, Map2 and DAPI immunolabelling in Control and  $\beta$ -cat<sup>del ex3-6</sup> NSCs cultured in B27 for 5 days at 6-, 12- and 18-days after virus transduction. YFP labels recombined cells and Map2 labels differentiated neurons. Scale bars, 50 $\mu$ m.

(C) Quantification of the proportion of Map2+ neurons in (B) (Control vs  $\beta$ -cat<sup>del ex3-6</sup>: 6days =  $53 \pm 3.61\%$  vs  $58.67 \pm 6.96\%$ , 12days =  $44 \pm 6.66\%$  vs  $57.33 \pm 3.93\%$ , 18days =  $46 \pm 5.69\%$  vs  $48.33 \pm 3.53\%$ ). Control and  $\beta$ -cat<sup>del ex3-6</sup> NSCs are similarly able to differentiate into neurons. Data shown are technical replicates of n=1 with an average of 147 cells counted per sample.

(D) YFP, GFAP and DAPI immunolabelling in Control and  $\beta$ -cat<sup>del ex3-6</sup> NSCs cultured in FBS for 5 days following 6-, 12- and 18-days after virus transduction. YFP labels recombined cells and GFAP labels differentiated astrocytes. Scale bars, 50 $\mu$ m.

(E) Quantification of the proportion of GFAP+ astrocytes in (D) (Control vs  $\beta$ -cat<sup>del ex3-6</sup>: 6days =  $63.33 \pm 3.18\%$  vs  $65 \pm 4.16\%$ , 12days =  $54.67 \pm 5.18\%$  vs  $57 \pm 7.21\%$ , 18days =  $52.33 \pm 0.67\%$  vs  $63.33 \pm 7.79\%$ ). Astrocytic differentiation is unaffected by loss of  $\beta$ -catenin. Data shown are technical replicates of n=1 with an average of 85 cells counted per sample.

Error bars represent mean with SEM.

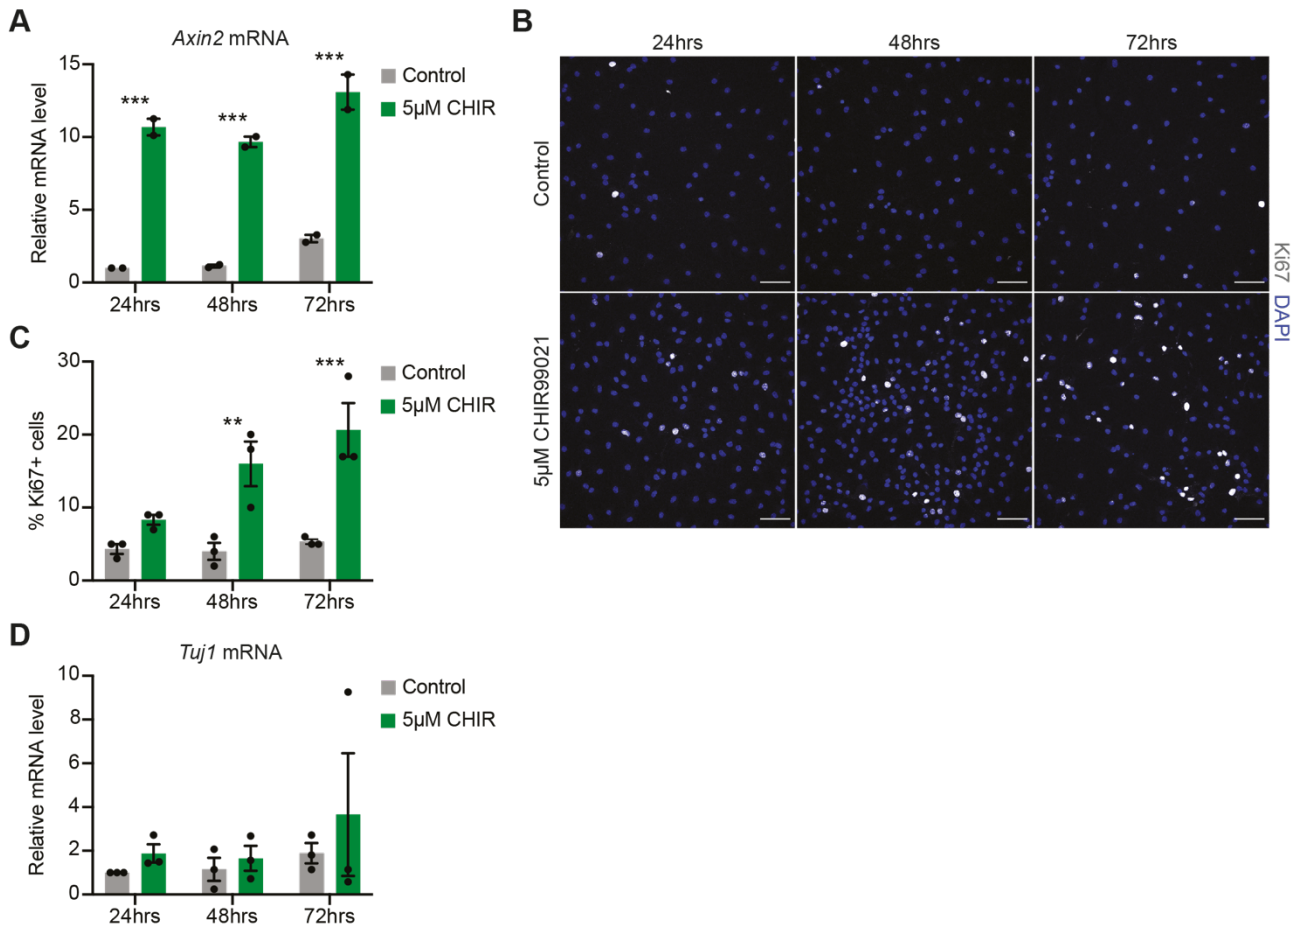

**Fig. S7. Quiescent NSC activation is sustained by prolonged Wnt/β-catenin stimulation.**

(A) Upregulation of *Axin2* is sustained by 5μM CHIR99021 treatment of quiescent NSCs for 24hrs, 48hrs and 72hrs. n=2.

(B) Immunolabelling of the proliferation marker Ki67 and DAPI in quiescent NSCs treated with 5μM CHIR99021 for 24hrs, 48hrs and 72hrs. Scale bars, 50μm.

(C) Quantification of the proportion of Ki67+ cells in (B). Proliferation increases with longer 5μM CHIR99021 treatments of quiescent NSCs (Control vs 5μM CHIR99021: 24hrs,  $4.33 \pm 0.67$  vs  $8.33 \pm 0.67$ . 48hrs,  $4 \pm 1.16$  vs  $16 \pm 3.06$ . 72hrs,  $5.33 \pm 0.33$  vs  $20.67 \pm 3.67$ ). n=3.

(D) *Tuj1* expression is not significantly upregulated by 5μM CHIR99021 treatments of quiescent NSCs over time. n=3.

Statistics: Two-way ANOVA with Sidak's multiple comparisons test (A, C and D). (ns,  $p < 0.05$ . \*\*,  $p < 0.01$ . \*\*\*,  $p < 0.001$ ). Error bars represent mean with SEM.

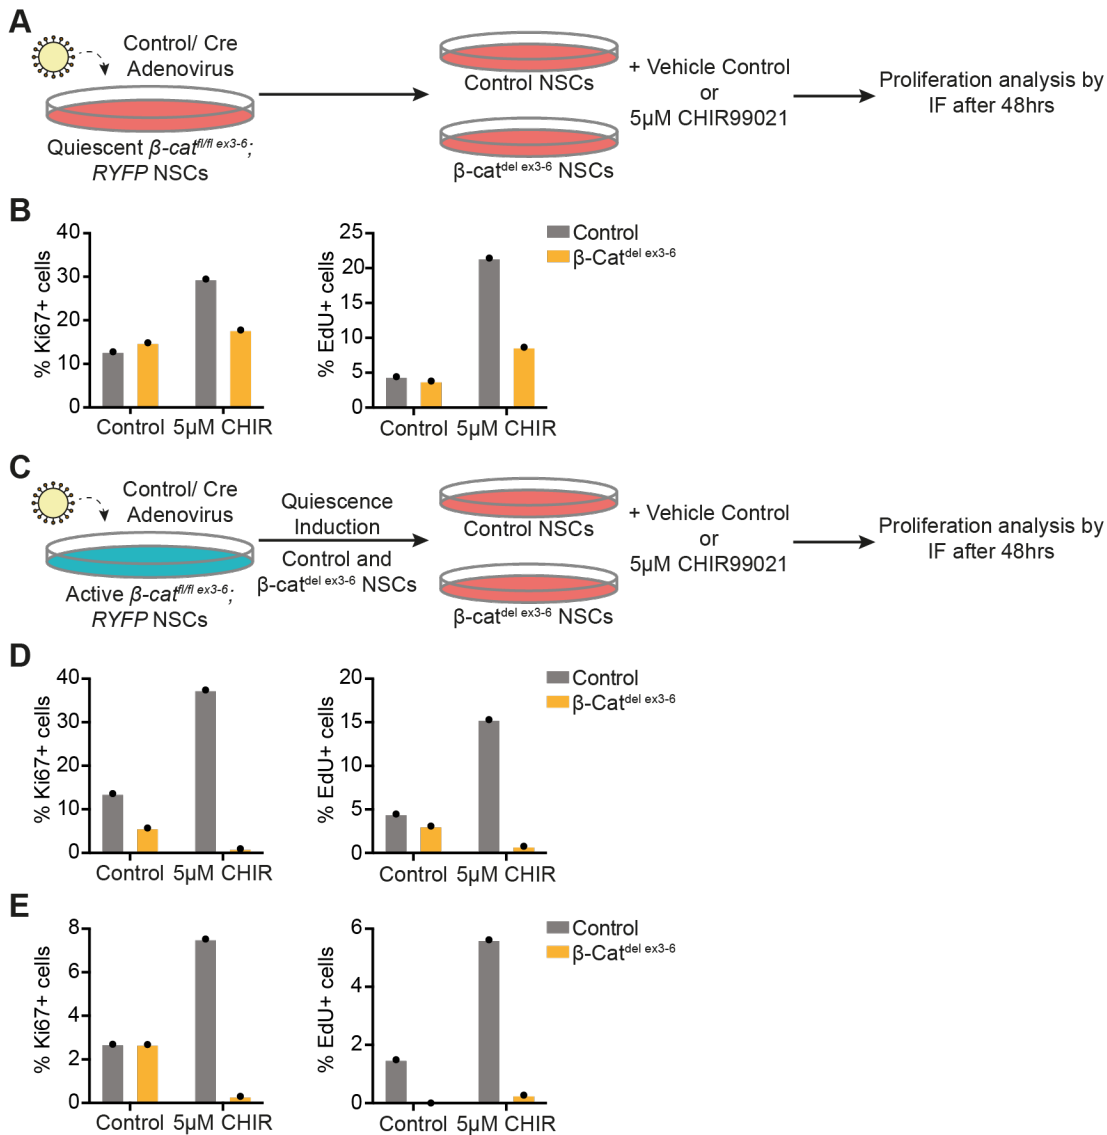

**Fig. S8. Details of replicates comprising the data shown in Fig. 7E-I**

(A) Quiescent  $\beta$ -cat<sup>fl/fl ex3-6</sup> NSCs were transduced with Control or Cre-adenovirus. Control and  $\beta$ -cat<sup>del ex3-6</sup> NSCs were then treated with either vehicle control or 5 $\mu$ M CHIR99021 for 48hrs before samples were collected for immunofluorescence analysis of proliferation markers.

(B) Quantification of the proportion of Ki67+ cells and the proportion of EdU+ cells in replicate 1 of the protocol detailed in (A).

(C) Quiescence was induced in control and  $\beta$ -cat<sup>del ex3-6</sup> NSCs 48hrs after transducing active  $\beta$ -cat<sup>fl/fl ex3-6</sup> NSCs with Control or Cre-adenovirus. After 72hrs of quiescence induction, Control and  $\beta$ -cat<sup>del ex3-6</sup> NSCs were treated with either vehicle control or 5 $\mu$ M CHIR99021 for 48hrs before samples were collected for immunofluorescence analysis of proliferation markers.

(D, E) Quantification of the proportion Ki67+ cells and the proportion of EdU+ cells in replicates 2 and 3 of the protocol detailed in (C).

See also the Materials & Methods section for further details.



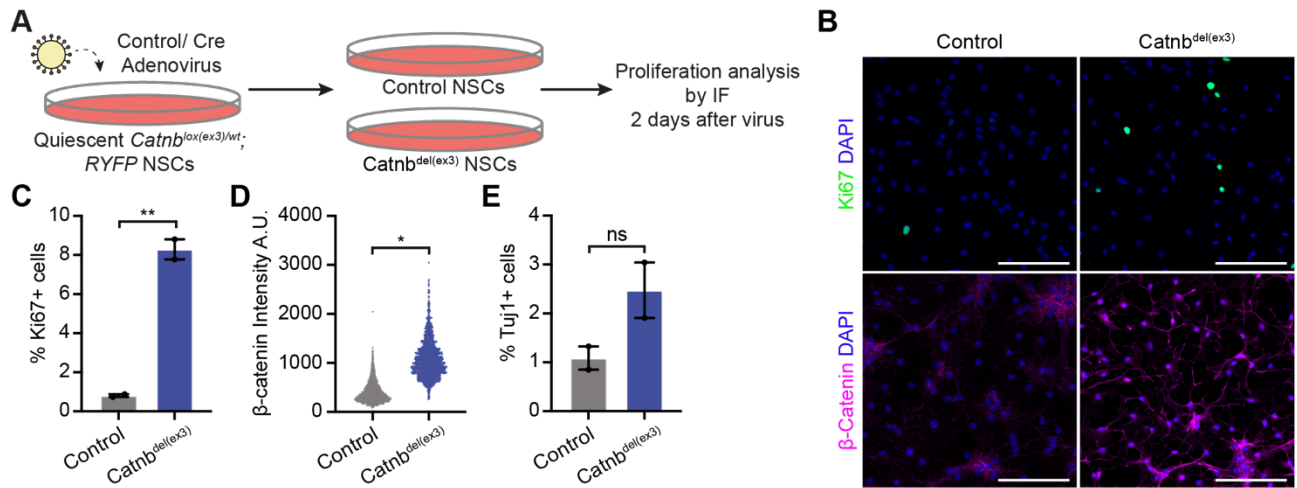

**Fig. S9. Stabilisation of  $\beta$ -catenin in quiescent NSCs promotes their reactivation similarly to 5 $\mu$ M CHIR99021 treatment.**

(A) Control and *Catnb<sup>del(ex3)</sup>* NSCs were taken 48hrs after transduction of quiescent *Catnb<sup>fl/wt(ex3)</sup>* NSCs with control and Cre adenovirus for immunofluorescence analysis.

(B) Ki67,  $\beta$ -catenin and DAPI immunolabelling in control and *Catnb<sup>del(ex3)</sup>* NSCs 48hrs after virus transduction. Scale bar, 100 $\mu$ m.

(C) Quantification of the data in (B). The proportion of Ki67+ cells is increased in *Catnb<sup>del(ex3)</sup>* NSCs ( $8.29 \pm 0.51\%$ ) compared with control ( $0.81 \pm 0.07\%$ ) indicating activation from quiescence upon stabilisation of  $\beta$ -catenin.  $n=2$ .

(D) Quantification of the data shown in (B) of the intensity of  $\beta$ -catenin staining in quiescent control and *Catnb<sup>del(ex3)</sup>* NSCs 48hrs after virus transduction.  $\beta$ -catenin intensity is increased in *Catnb<sup>del(ex3)</sup>* NSCs compared with control indicating stabilisation of  $\beta$ -catenin. A.U.= Arbitrary Units.  $n=2$ .

(E) The proportion of Tuj1+ cells is slightly increased in *Catnb<sup>del(ex3)</sup>* NSCs ( $2.48 \pm 0.56\%$ ) compared with control ( $1.09 \pm 0.24\%$ ) which is similar to the increase in Tuj1+ cells seen with 5 $\mu$ M CHIR99021 treatment in quiescent NSCs (Fig. 6F).  $n=2$ .

Statistics: unpaired two-tailed Student's t-test (C, D and E). (ns,  $p>0.05$ . \*,  $p<0.05$ . \*\*,  $p<0.01$ ).

Error bars represent mean with SEM.

**Table S1. Primary and secondary antibodies.**

| Target Molecule        | Species | Procedure           | Dilution | Supplier         | Catalogue #               |
|------------------------|---------|---------------------|----------|------------------|---------------------------|
| Actin                  | Rabbit  | WB                  | 1:1000   | Sigma-Aldrich    | A2066                     |
| $\beta$ -catenin       | Mouse   | IF- <i>in vivo</i>  | 1:100    | BD Biosciences   | 610154                    |
|                        |         | IF- <i>in vitro</i> | 1:250    |                  |                           |
|                        |         | WB                  | 1:2000   |                  |                           |
| $\beta$ -galactosidase | Chicken | IF                  | 1:1000   | Aves Lab Inc.    | BGL-1010                  |
| CyclinD1               | Rabbit  | IF                  | 1:25     | ThermoScientific | RM-9104                   |
| DCX                    | Goat    | IF                  | 1:50     | Santa-Cruz       | Sc-8066<br>(Discontinued) |
| GFAP                   | Rat     | IF                  | 1:800    | Invitrogen       | 13-0300                   |
| GFP                    | Chicken | IF                  | 1:2000   | Abcam            | ab13970                   |
| Ki67                   | Mouse   | IF                  | 1:100    | BD Biosciences   | 550609                    |
| Ki67                   | Rat     | IF                  | 1:200    | Invitrogen       | 14-5698-82                |
| Map2                   | Mouse   | IF                  | 1:200    | Sigma            | M4403                     |
| mCherry                | Rabbit  | IF                  | 1:500    | GeneTex          | GTX128508                 |
| NeuN                   | Mouse   | IF                  | 1:800    | Chemicon         | MAB377                    |
| Prox1                  | Rabbit  | IF                  | 1:800    | Merck            | Ab5475                    |
| Sox2                   | Rat     | IF                  | 1:400    | EBioscience      | 14-9811-82                |
| Tbr2                   | Rabbit  | IF                  | 1:200    | Abcam            | ab183991                  |
| Tuj1                   | Rabbit  | IF                  | 1:400    | Covance          | PRB-435P                  |
| Tuj1                   | Mouse   | IF                  | 1:400    | Covance          | MMS-435P                  |
| Wnt7a                  | Rabbit  | WB                  | 1:500    | Abcam            | ab100792                  |
| Vimentin               | Mouse   | WB                  | 1:2000   | Sigma            | V9131                     |
| Chicken IgG            | Donkey  | IF-488              | 1:500    | Jackson          | 703-545-155               |
| Mouse IgG              | Donkey  | IF-488              | 1:500    | Jackson          | 715-546-151               |
| Rat IgG                | Donkey  | IF-Cy3              | 1:500    | Jackson          | 712-166-153               |
| Rabbit IgG             | Donkey  | IF-Cy3              | 1:500    | Jackson          | 711-166-152               |
| Mouse IgG              | Donkey  | IF-Cy3              | 1:500    | Jackson          | 715-166-151               |
| Goat IgG               | Donkey  | IF-647              | 1:500    | Jackson          | 705-605-147               |
| Mouse IgG              | Donkey  | IF-647              | 1:500    | Jackson          | 715-606-151               |
| Rabbit IgG             | Donkey  | IF-647              | 1:500    | Jackson          | 711-606-152               |
| Rat IgG                | Donkey  | IF-647              | 1:500    | Jackson          | 112-175-167               |
| Mouse IgG              | Rabbit  | WB-HRP              | 1:1000   | Dako             | P0161                     |
| Rabbit IgG             | Goat    | WB-HRP              | 1:1000   | Dako             | P0448                     |

**Table S2. List of TaqMan probes from Applied Biosystems used for qPCR gene expression assays.**

| Gene                       | Assay ID      | Catalogue Number |
|----------------------------|---------------|------------------|
| ActinB                     | Mm00607939_s1 | 4352933E         |
| Ascl1                      | Mm03058063_m1 | 4331182          |
| Axin2                      | Mm00443610_m1 | 4331182          |
| GAPDH                      | Mm99999915_g1 | 4352932E         |
| HopX                       | Mm00558630_m1 | 4331182          |
| Id4                        | Mm00499701_m1 | 4331182          |
| Nestin                     | Mm00450205_m1 | 4331182          |
| Ngn2                       | Mm00437603_g1 | 4331182          |
| Sox2                       | Mm00488369_s1 | 4331182          |
| Tubb3 (Tuj1)               | Mm00727586_s1 | 4331182          |
| $\beta$ -catenin exons 4-5 | Mm01350386_g1 | 4351372          |
